# Supplementary material for: Peripheral immune cell profiling of double-hit lymphoma by mass cytometry
Source: Springer Nature journal article supplement (doi:10.1186/s12885-023-10657-0), 2023-02-23
Supplement: MOESM1 [file 24059192]

## *Supplementary Material*

**Supplementary Table 1.** Antibodies panel in this study

| <b>Target</b> | <b>Clone</b> | <b>Source</b> | <b>Label</b> |
|---------------|--------------|---------------|--------------|
| CCR2          | K036C2       | Fluidigm      | 153Eu        |
| CXCR4         | 12G5         | Fluidigm      | 173Yb        |
| CCR6          | G034E3       | Fluidigm      | 141Pr        |
| CXCR3         | G025H7       | Fluidigm      | 156Gd        |
| CCR4          | L291H4       | Fluidigm      | 158Gd        |
| CCR5          | NP6G4        | Fluidigm      | 144Nd        |
| CD33          | WM53         | Fluidigm      | 163Dy        |
| CD123         | 6H6          | Fluidigm      | 143Nd        |
| HLA-DR        | L243         | Fluidigm      | 174Yb        |
| CD11C         | \            | Fluidigm      | 146Nd        |
| CD127         | A019D5       | Fluidigm      | 149Sm        |
| CXCR5         | RF8B2        | Fluidigm      | 171Yb        |
| FOXP3         | 259D/C7      | Fluidigm      | 159Tb        |
| CD69          | FN50         | Fluidigm      | 162Dy        |
| Ki67          | B56          | Fluidigm      | 161Dy        |
| PD1           | EH12.2H7     | Fluidigm      | 155Gd        |
| CD28          | CD28.2       | Fluidigm      | 160Gd        |
| CCR7          | G043H7       | Fluidigm      | 167Er        |
| CD45RA        | HI100        | Fluidigm      | 170Er        |
| CD45RO        | UCHL1        | Fluidigm      | 165Ho        |
| TCRgd         | 11F2         | Fluidigm      | 152Sm        |
| CD3           | UCHT1        | Fluidigm      | 154Sm        |

|       |         |           |       |
|-------|---------|-----------|-------|
| CD161 | HP3G10  | Fluidigm  | 164Dy |
| CD14  | M5E2    | Fluidigm  | 175Lu |
| CD163 | GHI/61  | Fluidigm  | 145Nd |
| CD16  | 3G8     | Fluidigm  | 209Bi |
| CD56  | HCD56   | Fluidigm  | 176Yb |
| CD27  | LG.3A10 | Fluidigm  | 150Nd |
| CD38  | HIT2    | Fluidigm  | 172Yb |
| CD24  | ML5     | Fluidigm  | 166Er |
| CD73  | AD2     | Fluidigm  | 168Er |
| CD25  | 2A3     | Fluidigm  | 169Tm |
| CD19  | HIB19   | Fluidigm  | 142Nd |
| CD45  | HI30    | Fluidigm  | 89Y   |
| CD20  | 2H7     | biolegend | 148Nd |
| CD68  | Y1/82A  | biolegend | 114Cd |
| CD66b | G10F5   | biolegend | 113Cd |
| CD4   | RPA-T4  | biolegend | 111Cd |
| CD8   | RPA-T8  | biolegend | 116Cd |
| CD11B | ICRF44  | biolegend | 112Cd |
| CXCR2 | 48311   | R&D       | 151Eu |
| CXCR1 | 42750   | R&D       | 147Sm |

**Supplementary Table 2.** The therapies used for DHL patients and range from previous CR to the relapse time.

| <b>Patients</b> | <b>Immuno-chemotherapy <sup>1</sup></b>   | <b>Date of the previous CR</b> | <b>Date of sample acquisition <sup>2</sup></b> | <b>PFS (month) after CR</b> |
|-----------------|-------------------------------------------|--------------------------------|------------------------------------------------|-----------------------------|
| DHL001          | (R-CHOP ×1) + (R-EPOCH ×3) + (R2-CHOP ×1) | 2017.01.20                     | 2020.12.02                                     | 46.5                        |
| DHL002          | (R-CHOP ×2) + (R2-CHOP ×2) + (R-CHOP ×1)  | 2019.08.30                     | 2020.12.31                                     | 16                          |
| DHL003          | (R-CHOP ×1) + (R-EPOCH ×6)                | 2020.04.29                     | 2021.01.09                                     | 9                           |
| DHL004          | (R-CHOP ×1) + (R-EPOCH ×4)                | 2019.04.18                     | 2021.01.20                                     | 21                          |
| DHL005          | (R-EPOCH ×6) + (R ×2)                     | 2019.01.04                     | 2021.01.26                                     | 24.5                        |
| DHL006          | (R-CHOP ×8) + (R ×2)                      | 2020.01.10                     | 2021.02.03                                     | 12.5                        |
| DHL007          | (R-CHOP ×8) + (R ×2)                      | 2018.04.15                     | 2021.02.21                                     | 34                          |
| DHL008          | (R-CHOP ×1) + (R-EPOCH ×5)                | 2019.07.18                     | 2021.03.25                                     | 20                          |
| DHL009          | R-CHOP ×6                                 | 2016.08.23                     | 2021.04.02                                     | 55                          |
| DHL010          | (R-CHOP ×2) + (R2-CHOP ×4)                | 2018.01.16                     | 2021.05.26                                     | 40                          |
| DHL011          | (R-CHOP ×8) + (R ×2)                      | 2020.04.27                     | 2021.07.03                                     | 14                          |

<sup>1</sup>The whole immunochemotherapy used to achieve CR and the cycles of each therapy. R: Rituximab; R-CHOP: Rituximab, Cyclophosphamide, Doxorubicin hydrochloride, Vincristine, Prednisone; R-EPOCH: Rituximab, Etoposide, Prednisone, Vincristine, Cyclophosphamide, Doxorubicin

hydrochloride; R2-CHOP: Lenalidomide plus R-CHOP. <sup>2</sup>The date of sample acquisition was considered as the relapse time which was used for calculating PFS.



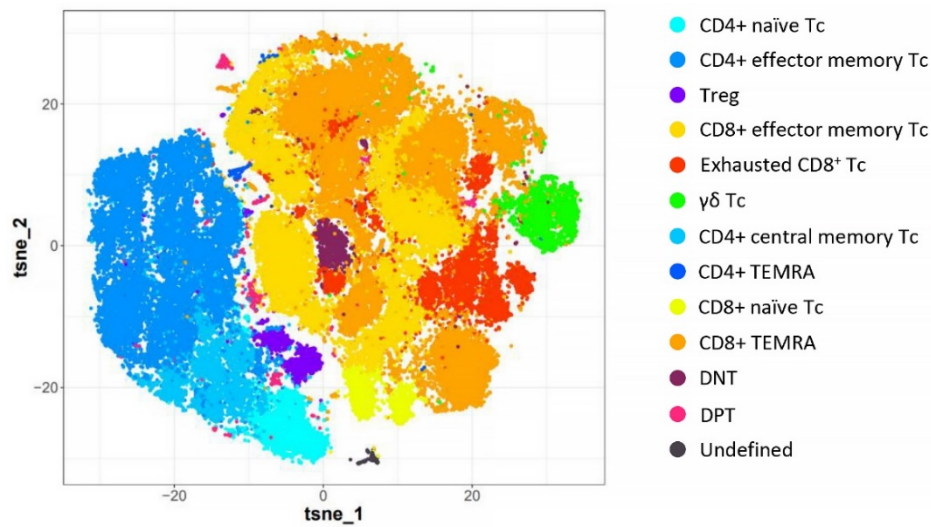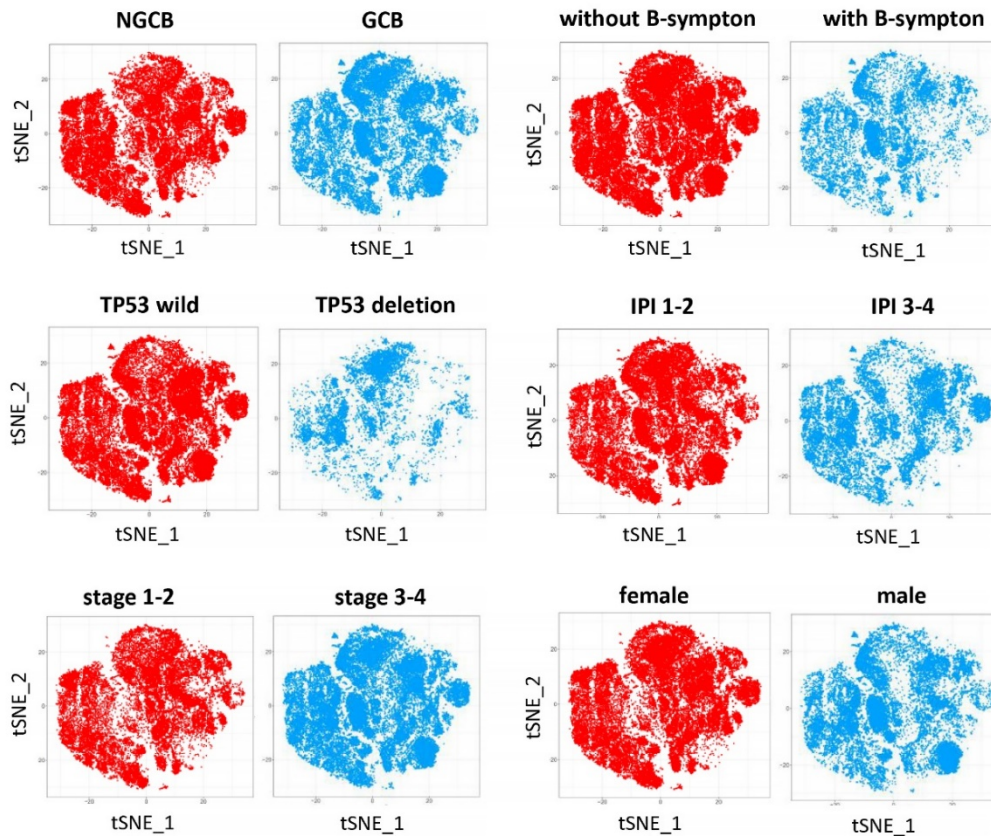

**Supplementary Figure S2.** T-distributed stochastic neighbor embedding (t-SNE) plot of CD3<sup>+</sup> cell subsets (T cells) of the whole DHL samples, and differences of cells subtypes distribution over clinical characteristics. Cells are colored based on cell types or groups.

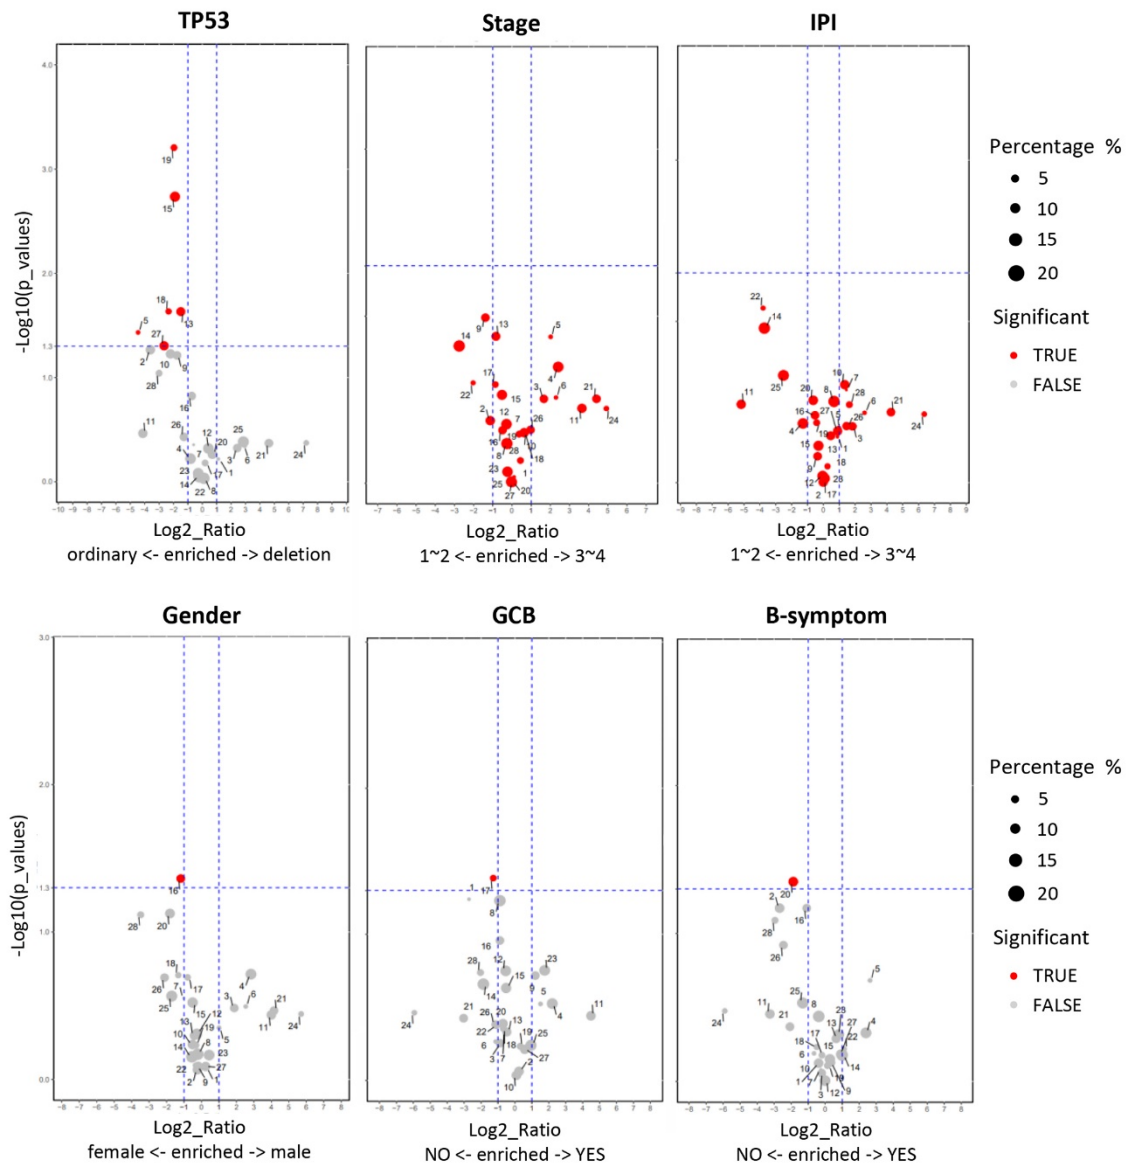

**Supplementary Figure S3.** Volcano plots reflecting the pairwise differences in the abundance of CD3<sup>+</sup> cell subsets over the six clinical characteristics, p values of cluster percentage were calculated by unpaired t-test. TP53 group: cluster5 (defined as DPT), cluster13 (defined as CD4<sup>+</sup> effector memory Tc), cluster15 (defined as CD4<sup>+</sup> central memory T cell), cluster18 (defined as CD8<sup>+</sup> naïve T cell), cluster19 (defined as Treg) and cluster27 (defined as exhausted CD8<sup>+</sup> T cell) show significant differences in normal or TP53 deletion patients; Gender group: cluster16 (defined as CD4<sup>+</sup> naïve T cell); GCB/NGCB: cluster17 (defined as DNT); B symptom: cluster20 (defined as exhausted CD8<sup>+</sup> T cell).



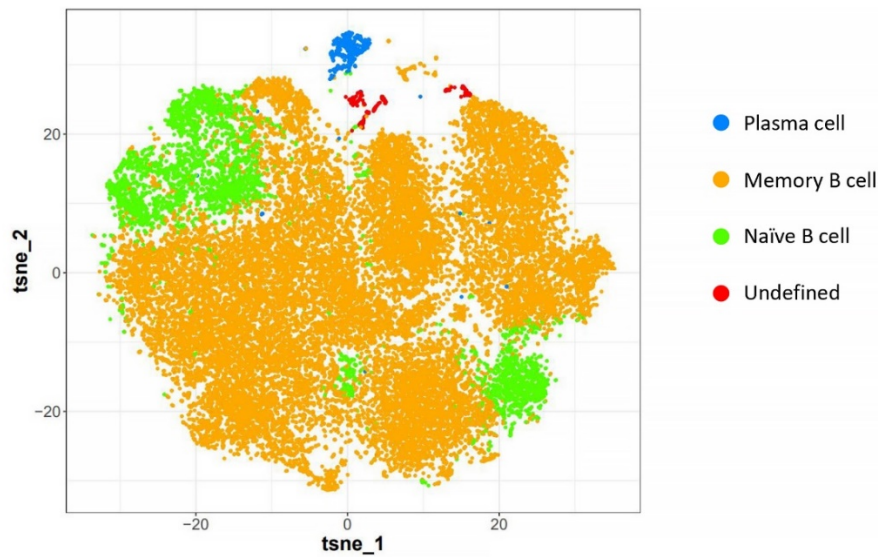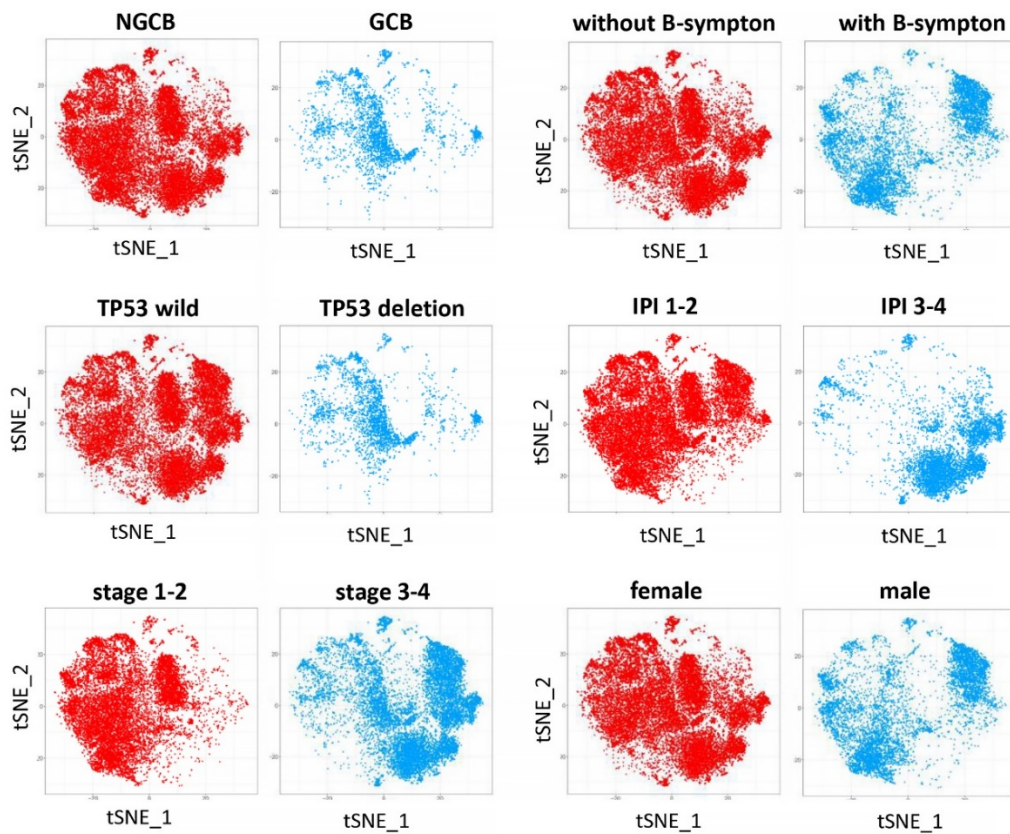

**Supplementary Figure S4.** T-distributed stochastic neighbor embedding (t-SNE) plot of CD19<sup>+</sup> cell subsets (B cells) of the whole DHL samples, and differences of cells subtypes distribution over clinical characteristics. Cells are colored based on cell types or groups.

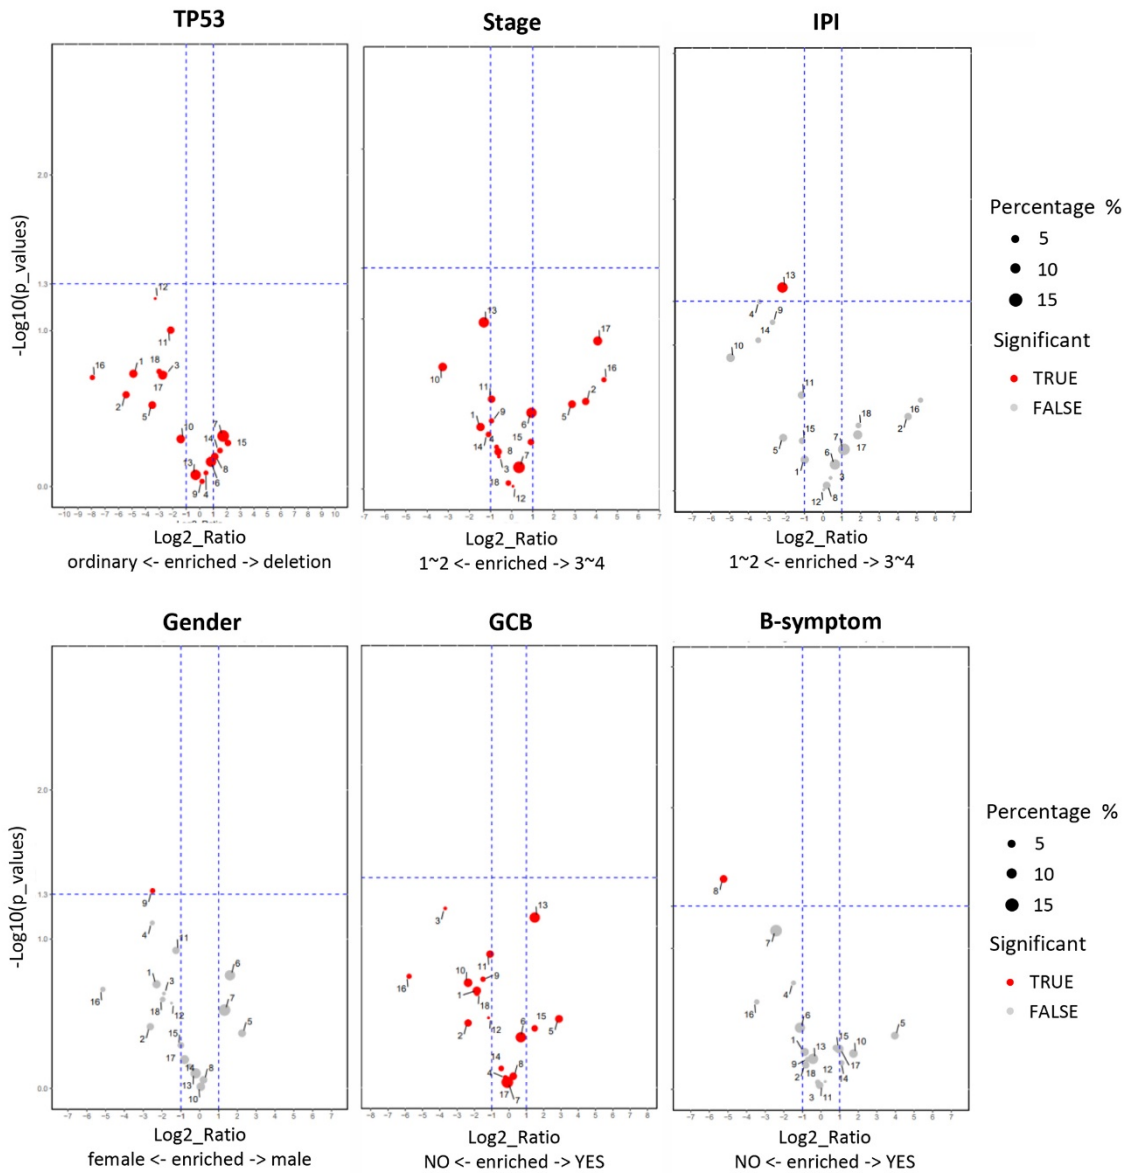

**Supplementary Figure S5.** Volcano plots reflecting the pairwise differences in the abundance of CD19<sup>+</sup> cell subsets over the six clinical characteristics, p values of cluster percentage were calculated by unpaired t-test. IPI group: cluster13 (defined as memory B cell); Sex group: cluster9 (defined as naïve B cell); B-symptom: cluster8 (defined as memory B cell).



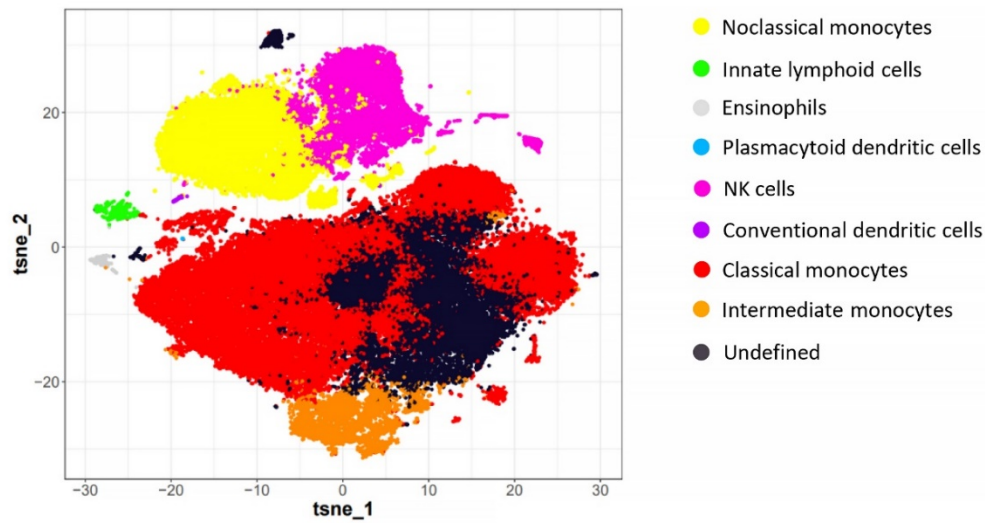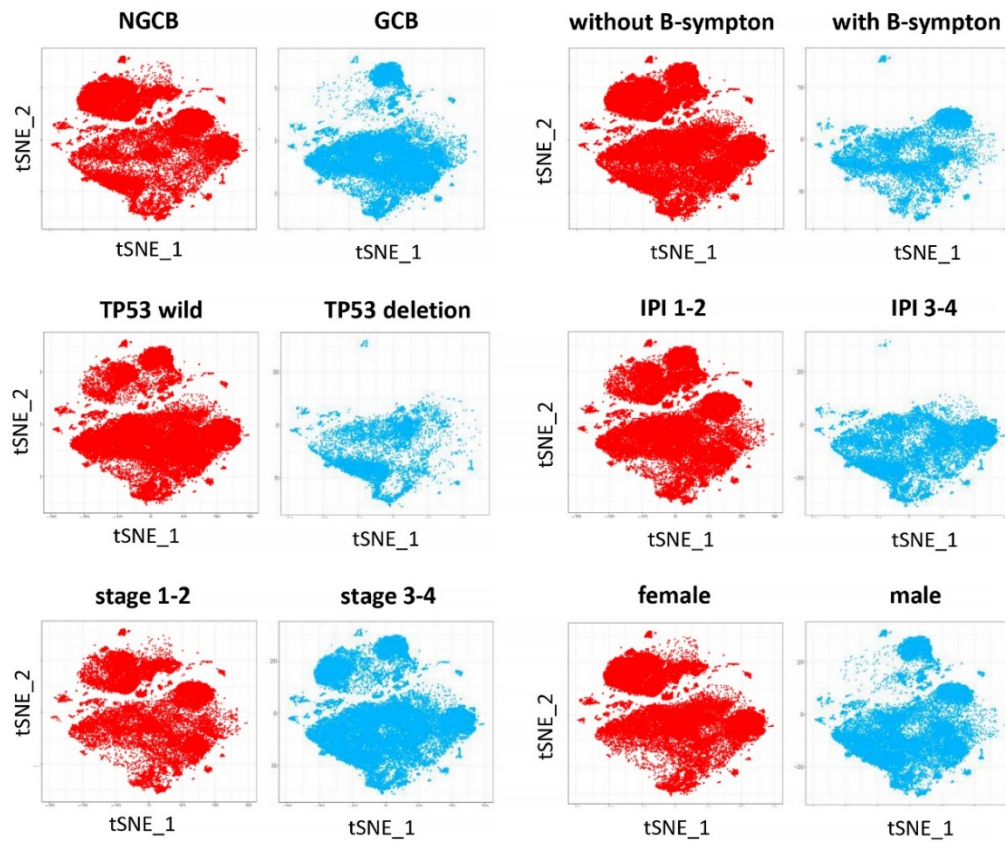

**Supplementary Figure S6.** T-distributed stochastic neighbor embedding (t-SNE) plot of CD11b<sup>+</sup> cell subsets (monocytes) of the whole DHL samples, and differences of cells subtypes distribution over clinical characteristics. Cells are colored based on cell types or groups.

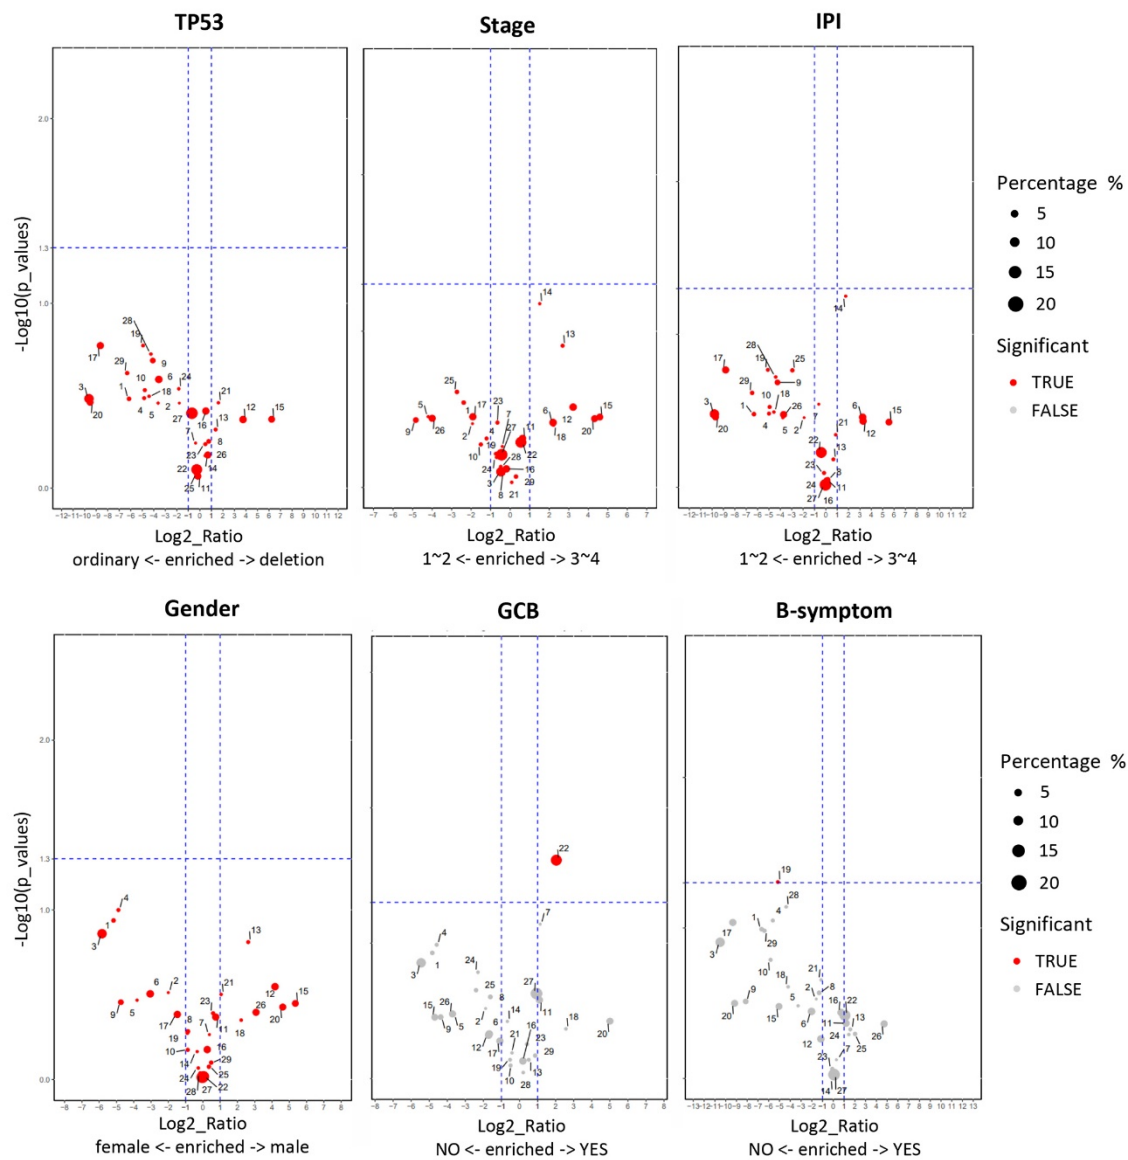

**Supplementary Figure S7.** Volcano plots reflecting the pairwise differences in the abundance of CD11b<sup>+</sup> cell subsets over the six clinical characteristics, p values of cluster percentage were calculated by unpaired t-test. GCB/NGCB: cluster22 (defined as classical monocytes); B-symptom: cluster19 (defined as NK cell).

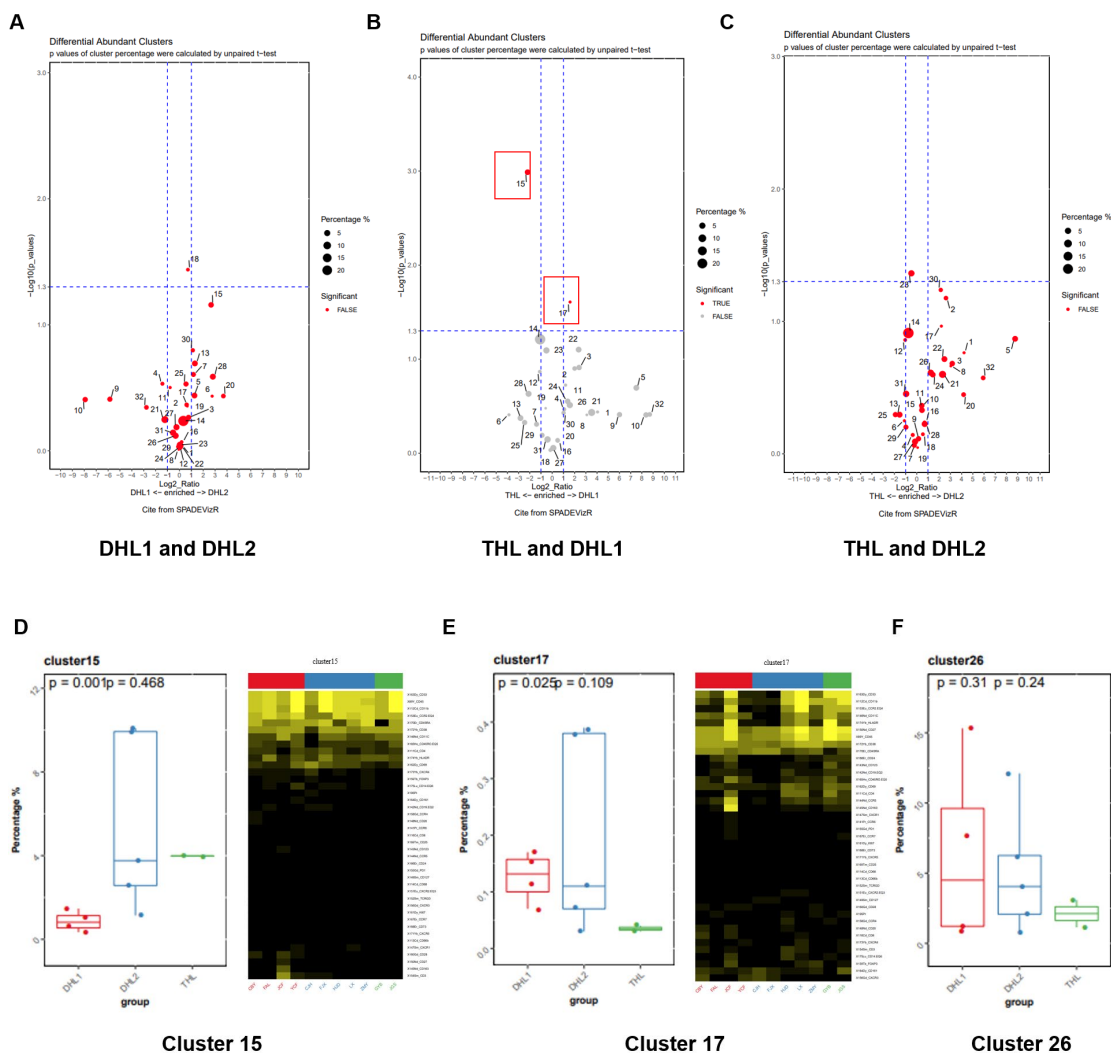

**Supplementary Figure S8.** Difference analysis of cell subsets in MYC/BCL2, MYC/BCL6 and triple hit patients. **(A, B and C)** Cell subpopulations with significant differences between the three groups of patients are shown in volcano plots. DHL1: MYC/BCL2 translocation DHL patients; DHL2: MYC/BCL6 translocation DHL; THL: triple hit lymphoma patients. **(D, E and F)** Differences in the proportions of cluster15 (DC), cluster17 (NK CD56<sup>bright</sup>) and cluster 26 among the three groups of patients. The heat maps show the expression of all detected proteins in cluster15 and cluster17 in each patient, DHL1 is marked in red, DHL2 is marked in blue, and THL is marked in green.

The differences among the MYC/BCL2, MYC/BCL6, and triple hits patients were further analyzed. Patients were divided into three groups for analysis and comparison, DHL1 (MYC/BCL2), DHL2 (MYC/BCL6), and THL (triple hits) group, respectively. Our results show that the abundance of cluster 15 (DC cell subpopulation) and 17 (NK bright cell subpopulation) was found to be significantly different between THL and DHL1 patients (**Figure S A**). BCL6 is one of the key factors

regulating the maturation of DC cells (Exp Cell Res. **2006**, 312(8):1312-22; PLOS One. **2014**, 9(6): e101208). Therefore, BCL6 translocation in THL patients may be responsible for the significantly increased abundance of DC subsets (Figure S8).

Furthermore, NK dim subpopulation is further analyzed. Studies have shown that the NK dim subpopulation (CD56<sup>dim</sup>, CD16<sup>bright</sup>) is high in peripheral blood and exhibits classic cytotoxicity (Biosci Rep. **2021** Jul 30;41(7): BSR20210600). The precursor of the NK dim subgroup, NK bright (CD56<sup>bright</sup>, CD16<sup>-</sup>), accounts for only 5%-10% of peripheral blood (J Immunol. **2016** Apr 1;196(7):2923-31). Increased numbers of NK bright cell subsets are reported in most multiple sclerosis disease treatments (J Clin Med. **2020** May; 9(5): 1450). Our analysis results suggest that the lower abundance of NK bright subpopulation may be one of the reasons why THL has a higher degree of malignancy than DHL (J Clin Pathol, **2020** Mar;73(3):126-138; Mod Pathol, **2018**, 31(9):1470-1478). However, due to the high heterogeneity of the samples, the NK dim subcluster (cluster 26), which plays a dominant role in cell killing, was not significantly reduced in abundance in THL patients (Figure S8). Therefore, further expansion of the sample size for analysis is necessary.

**A**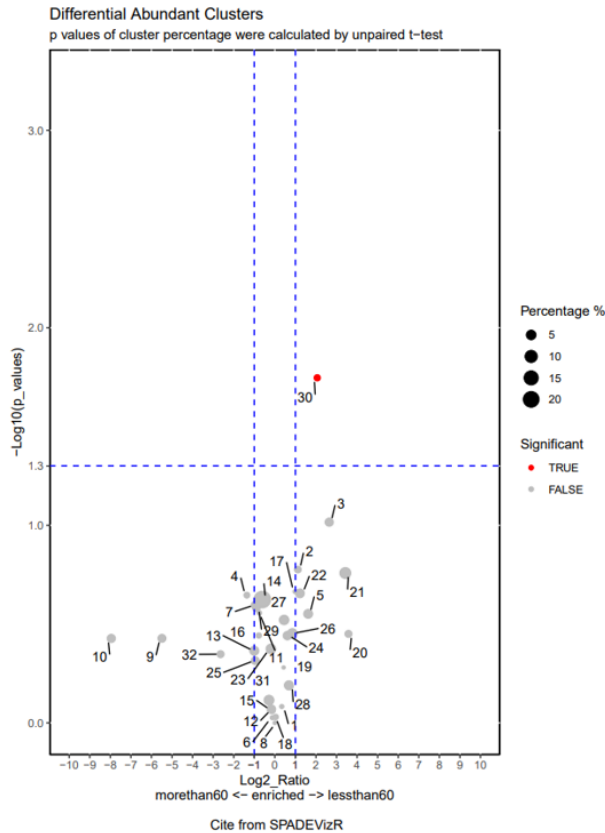**B**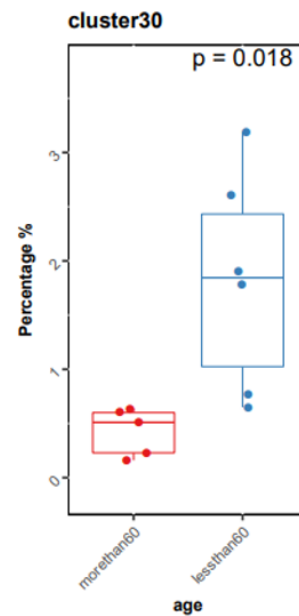

**Supplementary Figure S9. A.** Volcano plots reflecting the pairwise differences in the abundance of cell subsets among the two groups of PBMCs, p values of cluster percentage were calculated by unpaired t-test. **B.** Box plot displays immune cell subsets with significant differences over clinical characteristics of DHL patients in different age groups.

The cellular subsets of patients in two age groups (below/above 60) were further analyzed. The results show that the abundance of Cluster 30 was significantly different between the two groups. Cluster 30 is a CD8<sup>+</sup> naïve T cell with characteristics of CD45RA<sup>+</sup> and CCR7<sup>+</sup> CD8<sup>+</sup> T cells. Furthermore, the box plot shows that naïve CD8<sup>+</sup> T cells from patients over 60 years old significantly decreased, which is consistent with previous study (Immunol Cell Biol. **2022**, 100(10):805-821.).
